# Supplementary material
Source: PubMed Central journal article supplement (PMC7443887)
Supplement: pnas.2005745117.sapp.pdf [file pnas.2005745117.sapp.pdf]

Supplementary Information for

**JMJD5 couples with CDK9 to release the paused RNA polymerase II**

Haolin Liu<sup>a,b</sup>, Srinivas Ramachandran<sup>c</sup>, Nova Fong<sup>c</sup>, Tzu Phang<sup>d</sup>, Schuyler Lee<sup>a,b</sup>, Pirooz Parsa<sup>e</sup>, Xinjian Liu<sup>f</sup>, Laura Harmacek<sup>a</sup>, Thomas Danhorn<sup>a</sup>, Tengyao Song<sup>a</sup>, Sangphil Oh<sup>g</sup>, Qianqian Zhang<sup>h</sup>, Zhongzhou Chen<sup>h</sup>, Qian Zhang<sup>i</sup>, Ting-Hui Tu<sup>a</sup>, Carrie Happoldt<sup>a</sup>, Brian O'Conner<sup>a</sup>, Ralf Janknecht<sup>g</sup>, Chuan-Yuan Li<sup>f</sup>, Philippa Marrack<sup>a,b</sup>, John Kappler<sup>a,b,1</sup>, Sonia Leach<sup>a</sup>, Gongyi Zhang<sup>a,b,1</sup>

<sup>1</sup>Gongyi Zhang, zhangg@njhealth.org; John Kappler, kapplerj@njhealth.org

**This PDF file includes:**

Figures S1 to S6

Tables S1

**Other supplementary materials for this manuscript include the following:**

Dataset S1

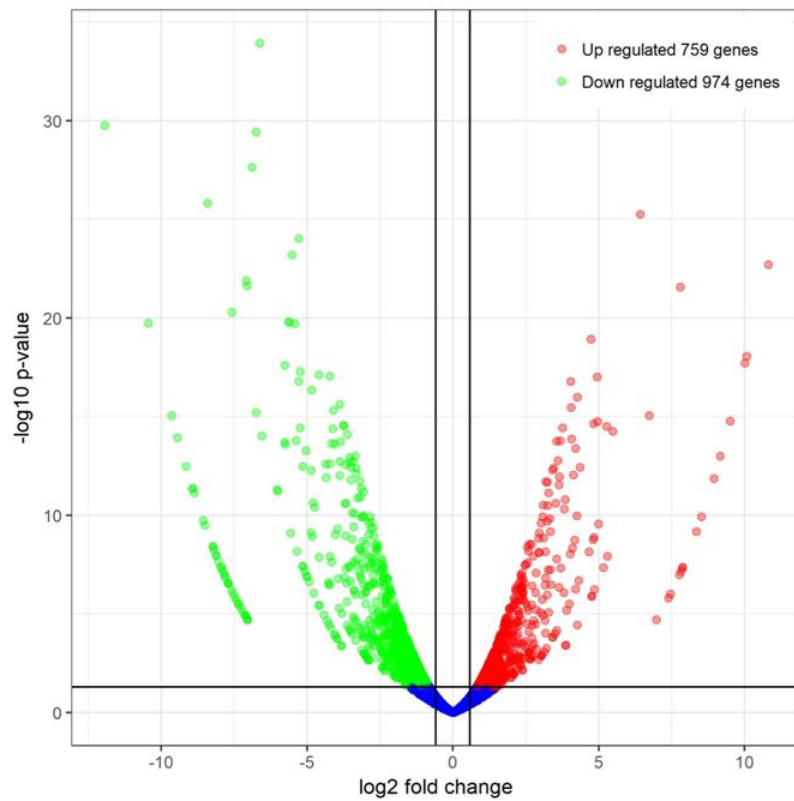

**Fig. S1. RNA-seq of wildtype and JMJD5 knockout cells. A volcano diagram of up-regulated and down-regulated RNA transcripts with JMJD5 knockout compared to the wildtype MEF cell was shown. The full list of up-regulated and down-regulated RNA transcripts can be found in the supplement Dataset S1 (PNAS\_202005745\_s2.xlsx).**

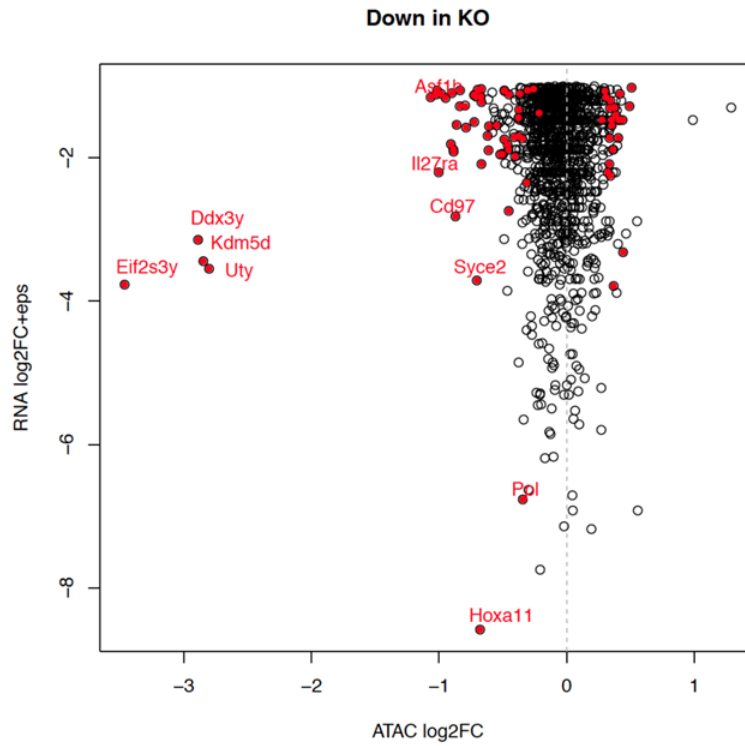

**Fig. S2.** Down-regulated genes in both RNA-seq and ATAC-seq methods in JMJD5 knock out cell line. The RNA-seq log<sub>2</sub>-fold expression change of genes significantly down-regulated in KO relative to WT (y-axis) is compared to ATAC-seq read coverage in open chromatin regions spanning each gene (-6000 nt to +3500 nt) (x-axis). Genes with significantly (fdr=0.1) differential chromatin accessibility between KO and WT are highlighted in red, with select gene names illustrated.

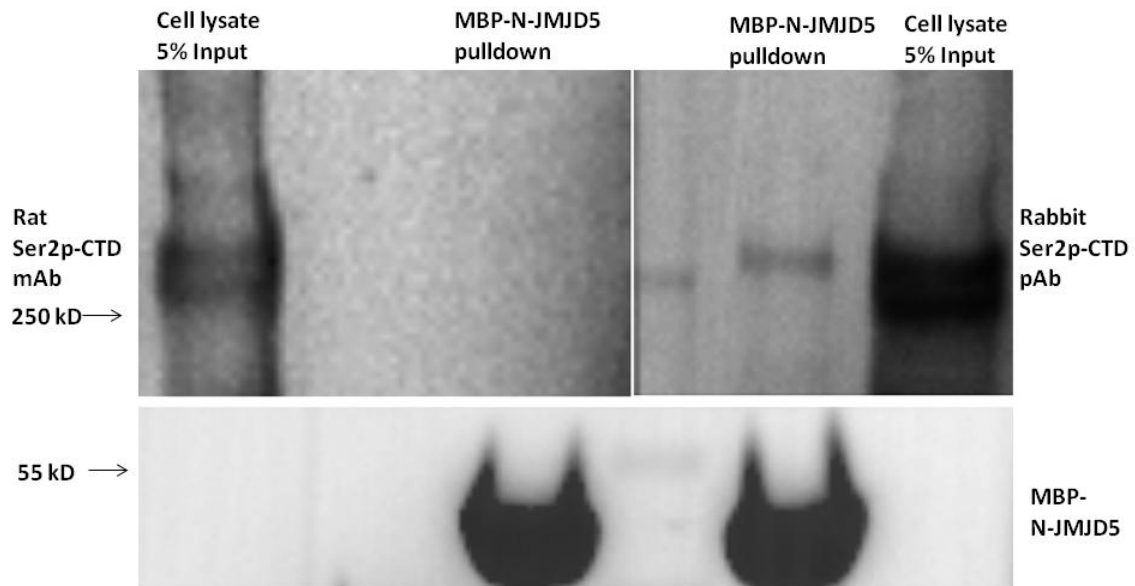

**Fig. S3. Comparison of Rat 3E10 and Rabbit S2p-CTD pAb in recognition of MBP-N-JMJD5 pulldown.** Equal amount of cell lysate input and MBP-N-JMJD5 pulldown product is ran on the SDS gel and transferred to the membrane and blotted by rat and rabbit serine2-CTD antibodies side by side. MBP-N-JMJD5 pulldown can be recognized by Rabbit S2p-CTD pAb (right) but not by Rat monoclonal 3E10 (left). MBP-N-JMJD5 was also blotted by MBP antibody as loading control.

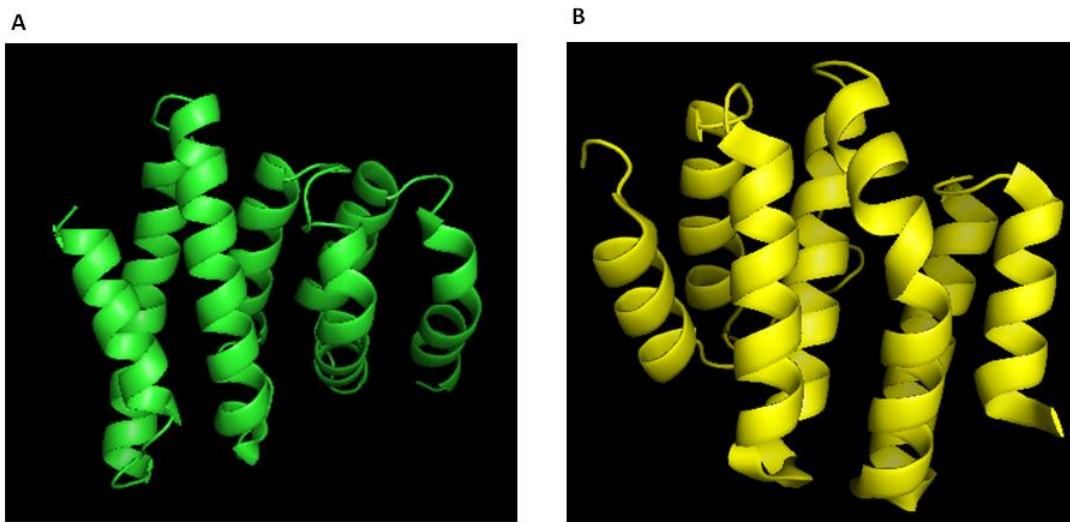

**Fig. S4. The similarity of structures between N-JMJD5 and RPRD1A. A. The predicted structure of N-JMJD5 is based on Jpred software for secondary structure prediction and 3D prediction using Raptor X software. B. Structure of CTD binding domain of RPRD1A, 4JXT, from PDB bank.**

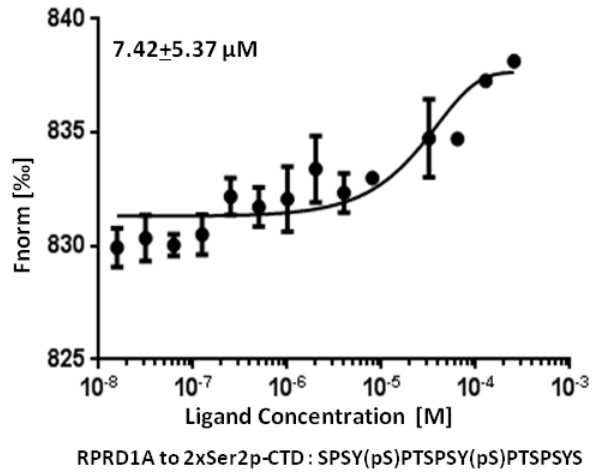

**Fig. S5. MST measurement of the binding between RPRD1A and Pol II CTD peptide with Ser2 phosphorylation at two heptad repeats.**

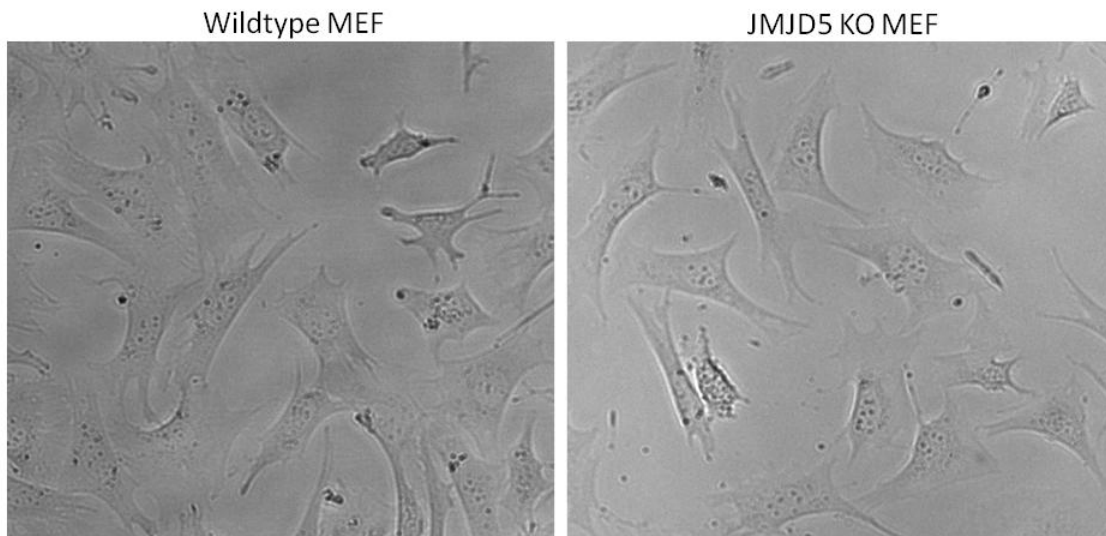

**Fig. S6. Bright field image of wildtype and JMJD5 KO MEF cells. Both cells were culture at regular DMEM medium with 10% of FBS. The images were captured by the 10 fold magnification camera.**

**Table S1. Antibodies used in this research**

| Antibody name                                 | Species | Vendor                  | Catalog number or Reference          |
|-----------------------------------------------|---------|-------------------------|--------------------------------------|
| Phospho-Serine2-CTD Pol II for blotting       | Rabbit  | Dr. David Bentley Lab   | Nat Struct Mol Biol 15, 71-78 (2008) |
| Phospho-serine2-CTD Pol II 3E10 for ChIP-seq  | Rat     | Active Motif            | # 61083                              |
| Phospho-serine5-CTD Pol II for blotting       | Rabbit  | Abcam                   | # 5131                               |
| CTD Pol II antibody for ChIP-seq and blotting | Rabbit  | Dr. David Bentley Lab   | Nat Struct Mol Biol 15, 71-78 (2008) |
| CDK9                                          | Mouse   | SantaCruz Biotechnology | sc-13130                             |
| $\beta$ -Actin                                | Mouse   | SantaCruz Biotechnology | Sc-69879                             |
| MBP antibody                                  | Mouse   | Made in our lab         | H71-22, PLoS One 10, e0136613 (2015) |
